# Supplementary material
Source: PubMed Central journal article supplement (PMC4519751)
Supplement: EC.00008-15_zek999094441so1.pdf [file EC.00008-15_zek999094441so1.pdf]

A.

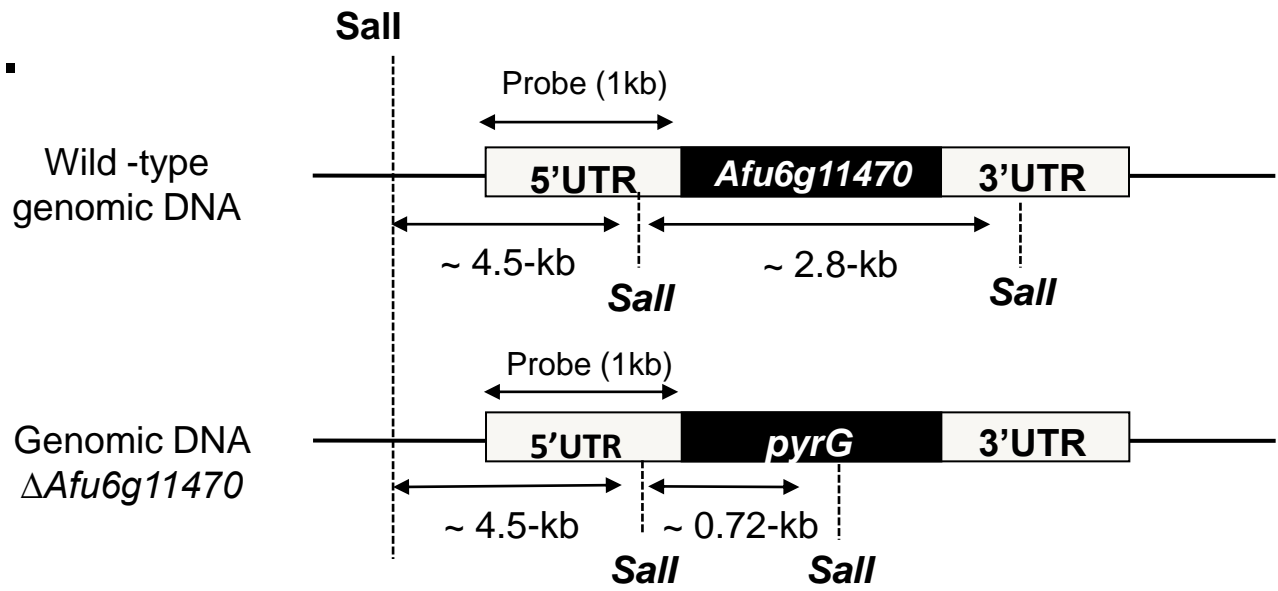

### Afu6g11470

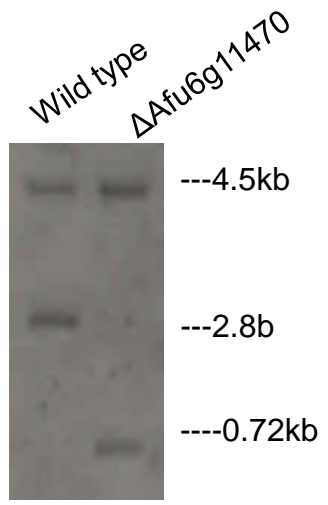

B.

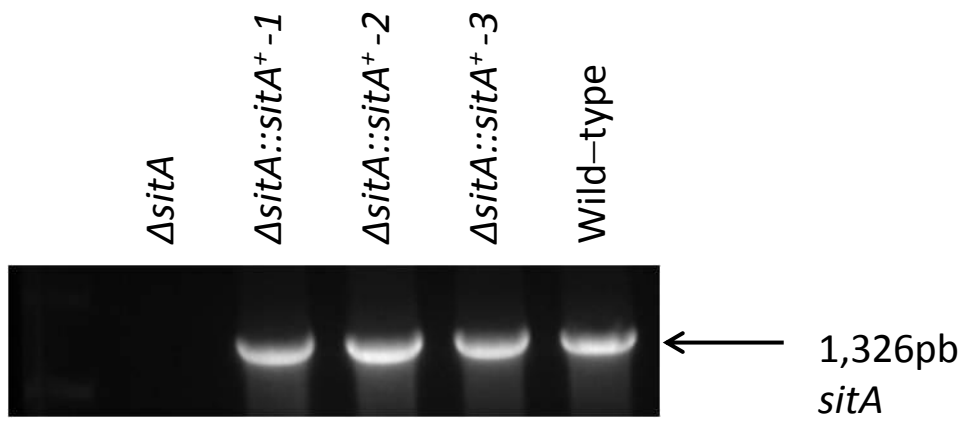

Figure S1 – (A) Southern blot analysis for Afu6g11470 (*sitA*) null mutant mutant.  
(B) PCR analysis showing the complementing strain.

**A.**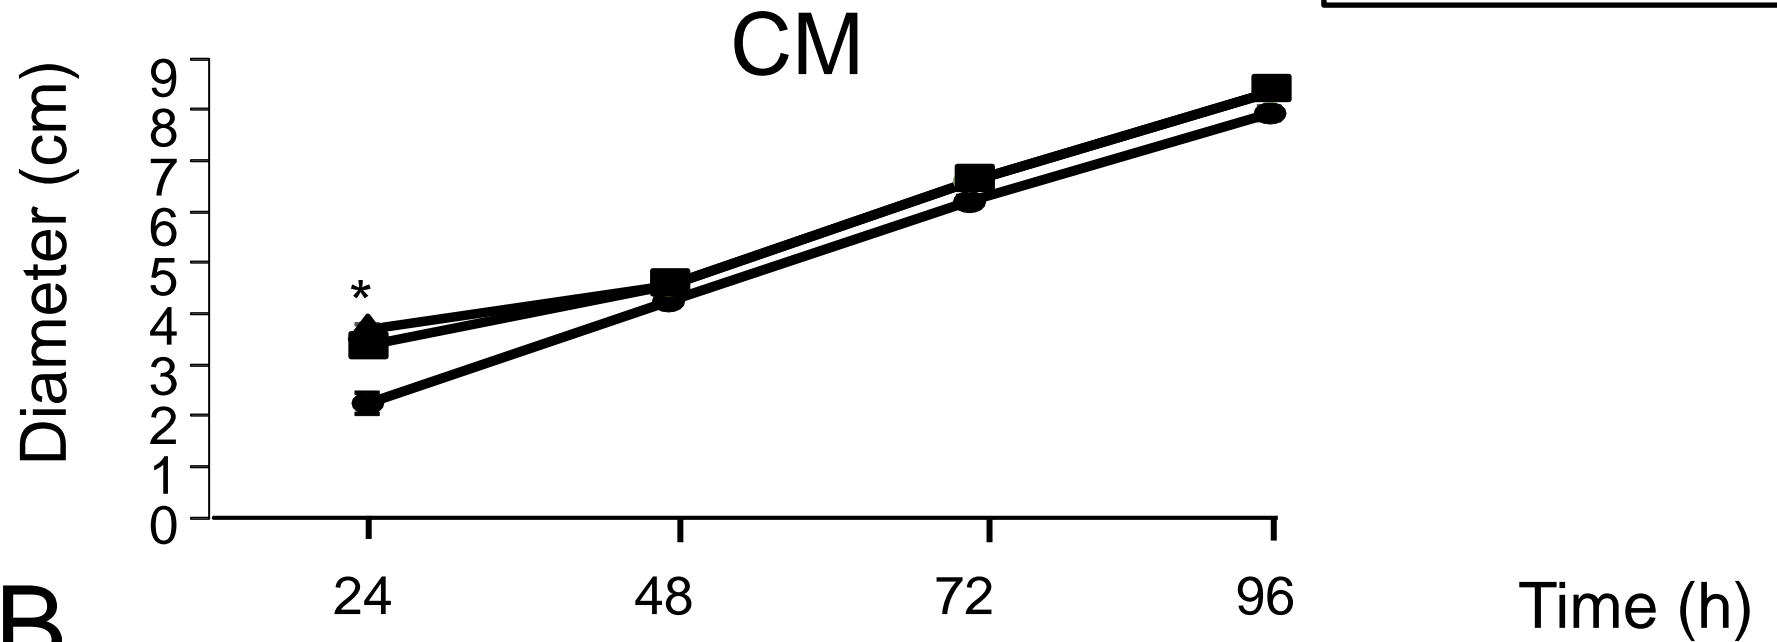**B.**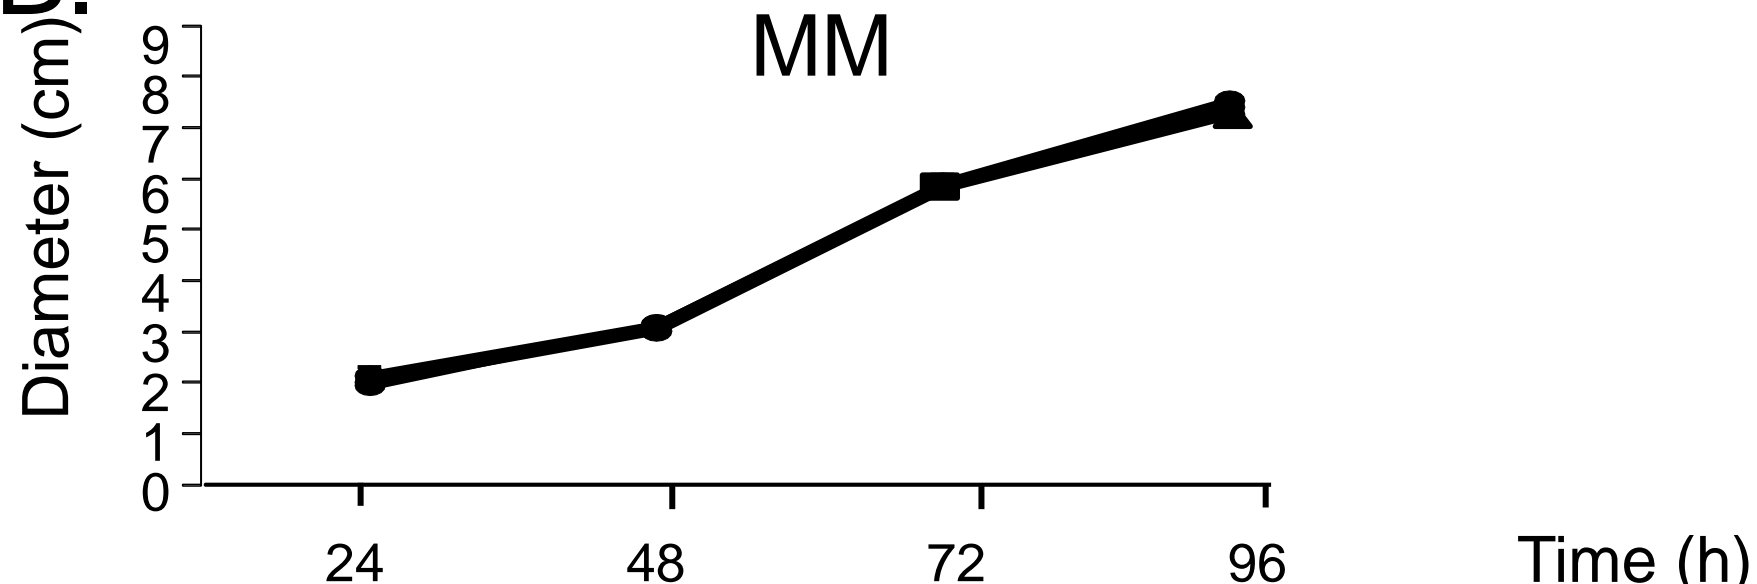

Figure S2 – Growth curves (radial diameter) for *A. fumigatus* wild-type,  $\Delta sitA$ , and  $\Delta sitA::sitA^+$  grown in complete medium, CM (A) and minimal medium, MM (B) for 24 to 96 hours at 37 °C (\*, *p*-value <0.01 when compared to the wild-type strain).

.

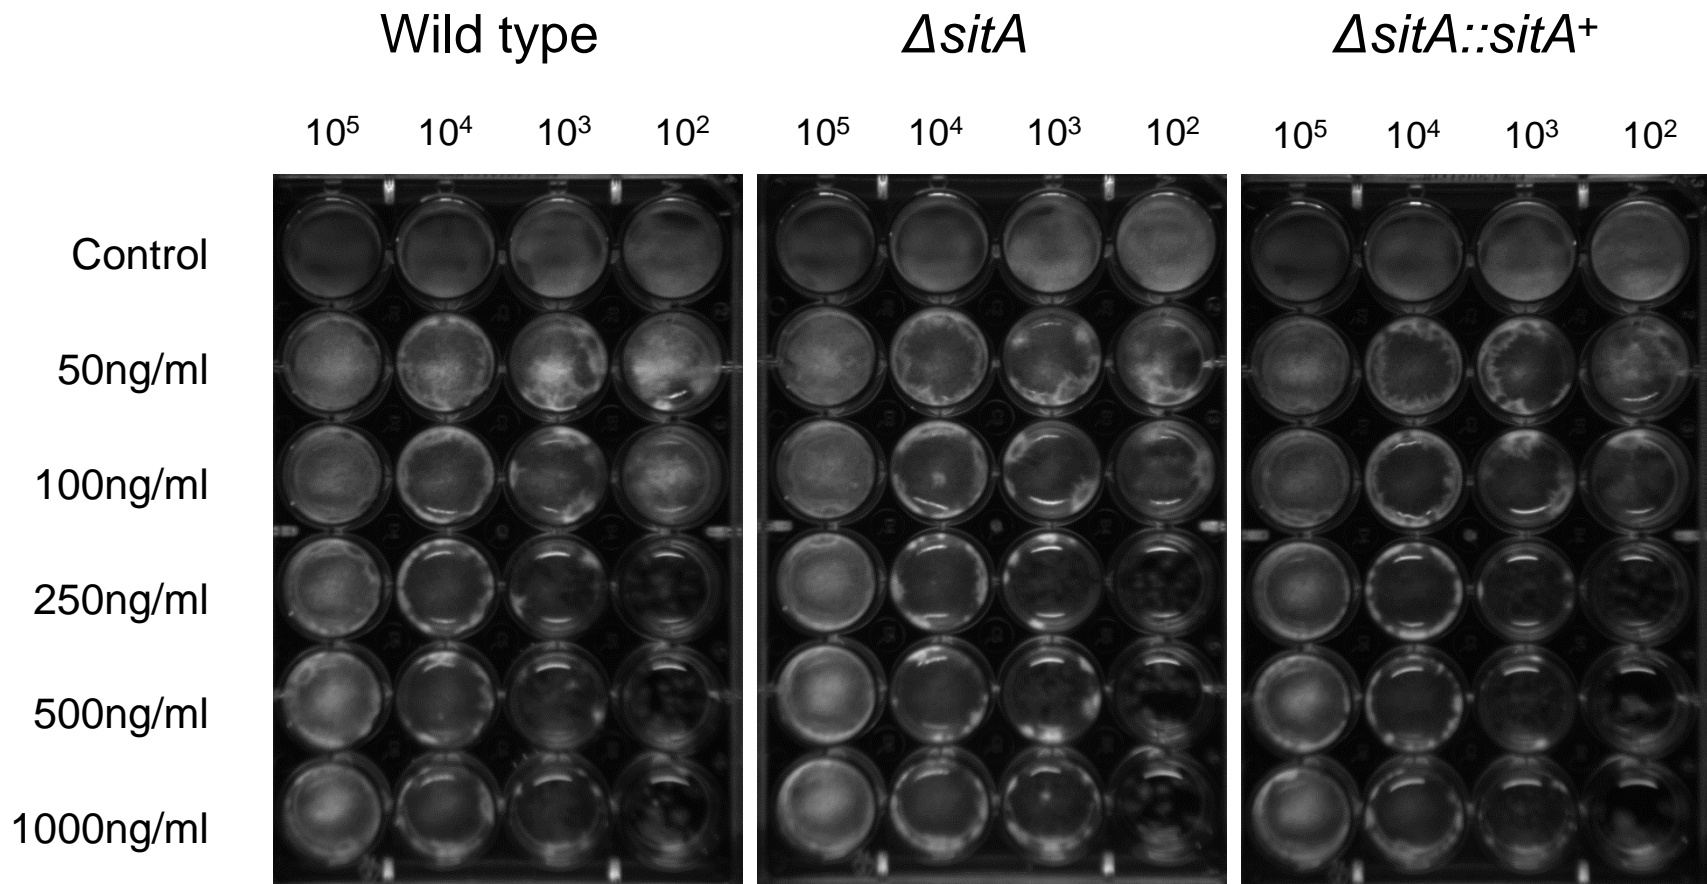

Figure S3 – Conidia dropout growth experiments with rapamycin.

A.

Wild-type

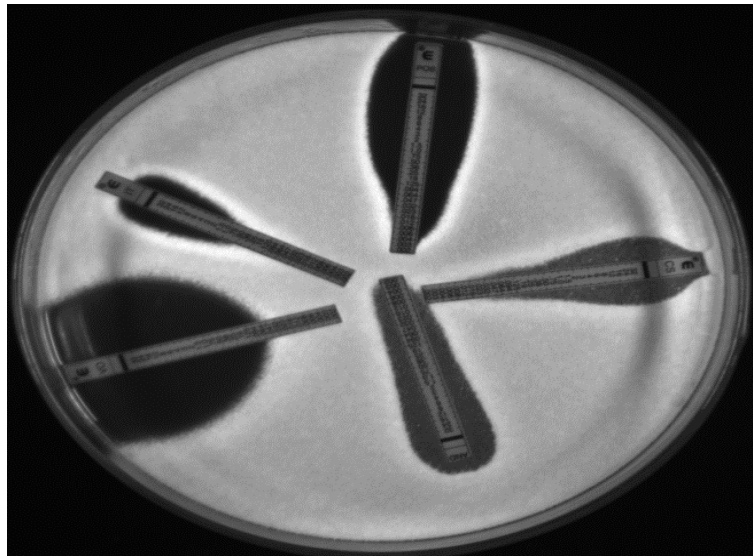

$\Delta sitA$

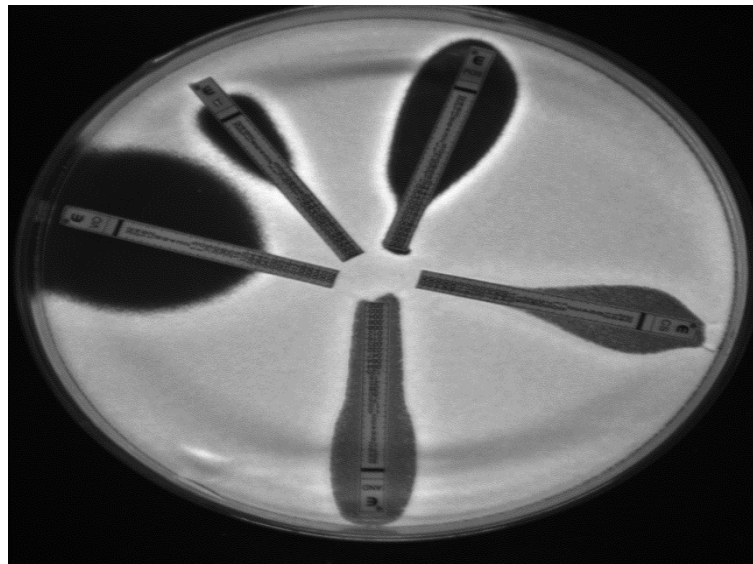

| MIC ( $\mu\text{g/ml}$ ) | Voriconazole | Itraconazole | Posaconazole | Caspofungin | Anidulafungin |
|--------------------------|--------------|--------------|--------------|-------------|---------------|
| Wild type                | 0.064        | 0.75         | 0.016        | 0.023       | ND            |
| $\Delta sitA$            | 0.064        | 0.75         | 0.016        | 0.19        | ND            |

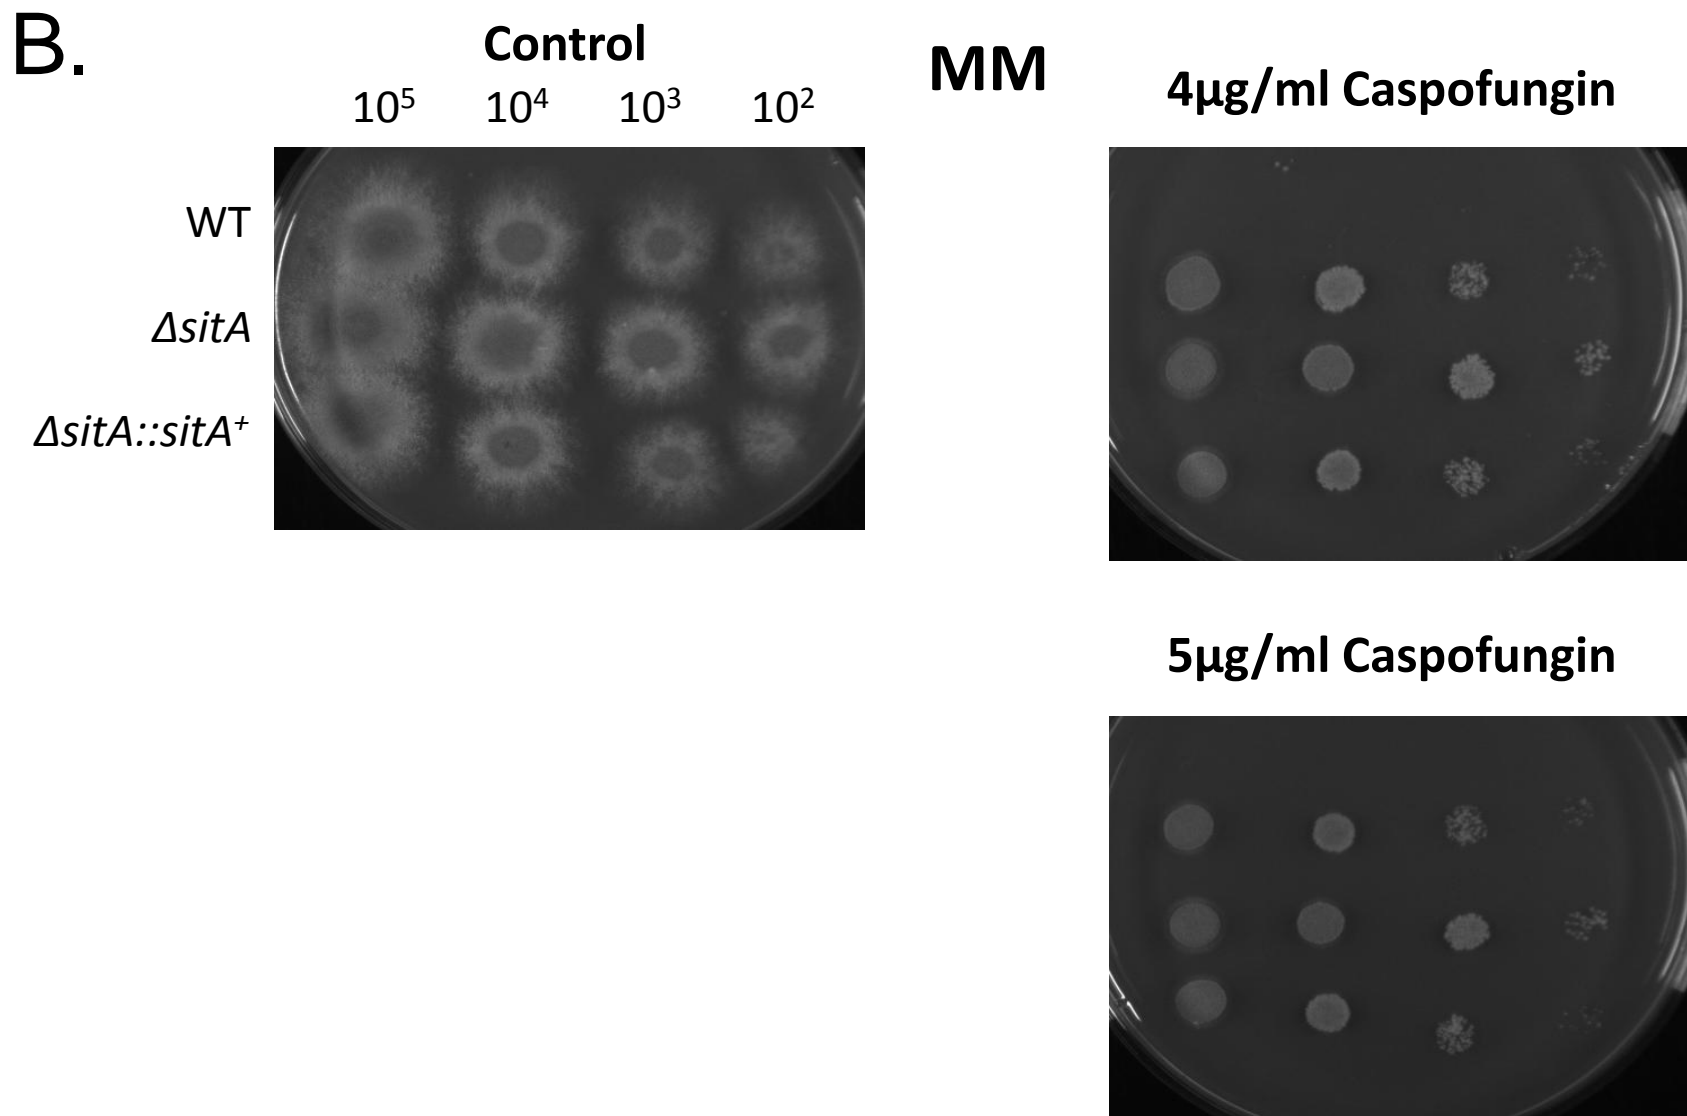

Figure S4 – (A) Etests for the *Aspergillus fumigatus* wild-type and  $\Delta sitA$ . (B) Drop-out experiments for caspofungin.



Table S1 Oligonucleotide sequences of the primers used in this study

Afu6g11470 pRS426 5fw

5'GTAACGCCAGGGTTTTCCAGTCACGACGCGGGATCTTGGTCAATTGTACC-3'

Afu6g11470 pyrG 5rv

5'- GCCTCCTCTCAGACAGAATGGTGCGGGTGCGGACGAACG -3'

Afu6g11470 pyrG 3fw

5'- GCATTGTTTGAGGCGAATTCCCTAGCATGCTTGATGGTCTG -3'

Afu6g11470 pRS426 3rv

5'GCGGTTAACAATTTCTCTCTGGAAACAGCCCTGATTATTCCATTCCCGC-3'

Afu6g11470 ORF fw

5'-ATGGTGGACAACAAGATCCCTGAGCCGGG-3'

Afu6g11470 ORF rv

5'-GAGGTATTCTACAAGAAGTACTCGCTGCGGCCCG-3'

Afu6g11470 5'ext fw

5'-CCAGCCCTCCGACGGCCGCC-3'
